# Supplementary material
Source: ML conference proceedings conference paper supplement (https://openreview.net/forum?id=o1TKGCrSL7)
Supplement: supplementary_material [file attachment]

## A THE EFFECT OF TEXT PROMPT

Table 7: Under CelebA and CLIP (ViT-B/32), the average accuracy and worst-case accuracy over sub-populations with varying classification text prompt and debiasing text prompt. (%)

| Classification text prompt<br>And Debiasing text prompt              | Method    | Avg. Acc. | Worst-case Acc. |
|----------------------------------------------------------------------|-----------|-----------|-----------------|
| Input space sub-group: {female, male}                                |           |           |                 |
| "a photo of a {not blond, blond} hair people"                        | Zero-shot | 85.2      | 70.6            |
| And "a photo of a {female, male} people" <sup>1</sup>                | L-DRO     | 83.6±0.3  | <b>79.2±1.3</b> |
| Or "a photo of a {female, not female} people"                        | L-DRO     | 88.8±0.3  | 65.0±0.9        |
| Or "a photo of a {male, not male} people"                            | L-DRO     | 89.4±0.3  | 37.8±2.2        |
| Or "a photo of a {[female, not female],<br>[male, not male]} people" | L-DRO     | 89.9±0.3  | 60.7±2.4        |
| Input space sub-group: {old, young}                                  |           |           |                 |
| "a photo of a {not blond, blond} hair people"                        | Zero-shot | 85.1      | 73.5            |
| And "a photo of a {old, young} people"                               | L-DRO     | 84.4±0.3  | 74.5±1.5        |
| Or "a photo of a {old, not old} people"                              | L-DRO     | 82.2±0.05 | 78.2±0.6        |
| Or "a photo of a {young, not young} people"                          | L-DRO     | 91.3±0.1  | 51.6±1.9        |
| Or "a photo of a {[old, not old],<br>[young, not young]} people"     | L-DRO     | 88.0±0.7  | <b>84.3±1.6</b> |

<sup>1</sup> " " denotes default choice.

Table 8: Under Waterbirds and CLIP (ViT-B/32 and RN50), the Average Accuracy (Avg.Acc.) and Worst-Case Accuracy (W.C.Acc.) over sub-populations with varying classification text prompt and debiasing text prompt.(%)

| Classification text prompt<br>And Debiasing text prompt | Method    | RN50<br>(Avg.Acc & W.C.Acc.) | ViT-B/32<br>(Avg.Acc & W.C.Acc.) |
|---------------------------------------------------------|-----------|------------------------------|----------------------------------|
| "a {landbird, waterbird}"                               | Zero-shot | 68.1 & 43.4                  | 74.8 & 56.8                      |
| And "{water, land}"                                     | L-DRO     | 72.6±1.2 & 49.5±2.7          | 75.1±1.6 & 56.6±2.6              |
| Or "{water, forest}"                                    | L-DRO     | 74.9±1.2 & <b>57.6±2.6</b>   | 77.6±0.5 & <b>64.8±0.8</b>       |
| "photo of {landbird, waterbird}"                        | Zero-shot | 66.3 & <b>43.2</b>           | 66.1 & 39.6                      |
| And "photo of {water, land}"                            | L-DRO     | 63.3±1.4 & 41.0±3.3          | 76.0±0.7 & <b>61.9±1.4</b>       |
| "photo of a {landbird, waterbird}"                      | Zero-shot | 78.1 & 34.0                  | 68.7 & 43.6                      |
| And "photo of a bird on<br>{water, land}"               | L-DRO     | 74.3±0.9 & <b>57.9±1.8</b>   | 71.8±2.5 & <b>49.7±4.7</b>       |
| "photo of a {landbird, waterbird}"                      | Zero-shot | 78.1 & 34.0                  | 68.7 & 43.6                      |
| And "photo of a bird on<br>{water, land} background"    | L-DRO     | 77.4±1.3 & <b>62.7±2.8</b>   | 70.0±3.2 & <b>46.9±4.8</b>       |
| "a photo of a {landbird, waterbird}"                    | Zero-shot | 76.8 & 40.8                  | 69.7 & 45.5                      |
| And "a photo of a bird on<br>{water, land}"             | L-DRO     | 73.9±3.0 & <b>54.4±4.6</b>   | 71.4±3.4 & <b>50.2±5.2</b>       |
| "a photo of a {landbird, waterbird}"                    | Zero-shot | 76.8 & 40.8                  | 69.7 & <b>45.5</b>               |
| And "a photo of a bird on<br>{water, land} background"  | L-DRO     | 75.3±0.8 & <b>58.1±1.7</b>   | 67.5±2.9 & 43.9±4.2              |

## B EFFECTS OF TWO-PHASE TRAINING ON DRO METHODS

Table 9: The average accuracy and worst-case accuracy over different datasets and methods.<sup>[1]</sup> (%)

| Dataset | Architecture                            | Method         | Average Acc. | Worst-case Acc. |
|---------|-----------------------------------------|----------------|--------------|-----------------|
| CelebA  | $I \triangleright A^2 \triangleright T$ | ERM            | 95.3±0.1     | 44.2±2.5        |
|         | $I \triangleright A^2 \triangleright T$ | CVaR DRO       | 86.6±1.0     | 11.7±9.7        |
|         | $I \triangleright A^2 \triangleright T$ | $\chi^2$ -DRO  | 84.2±8.3     | 61.3±8.5        |
|         | $I \triangleright A^2 \triangleright T$ | CVaR DRO*      | 84.8±4.9     | 67.1±10.4       |
|         | $I \triangleright A^2 \triangleright T$ | $\chi^2$ -DRO* | 87.4±4.5     | 72.0±9.6        |

<sup>1</sup> Keeping the same settings with Table 6. And \* denotes using the same two-phase training strategy with JTT, and the method without \* denotes the original version (mini-batch) of CVaR DRO and  $\chi^2$ -DRO.

## C TEXT PROMPT FOR CLIP (ViT-L/14)

Table 10 reveals that the effectiveness of text prompts on CLIP (ViT-B/32) does not consistently translate to high performance on CLIP (ViT-L/14). Employing "a photo of a { } people" as the prompt for CLIP (ViT-L/14) achieves a more reasonable performance, and the introduction of L-DRO further enhances the overall performance in this context.

Table 10: Under CelebA and CLIP (ViT-L/14), the average accuracy and worst-case accuracy over sub-populations with varying classification text prompt and debiasing text prompt <sup>1</sup>.(%)

| Classification text prompt<br>And Debiasing text prompt | Method    | Average Acc. | Worst-case Acc. |
|---------------------------------------------------------|-----------|--------------|-----------------|
| "a photo of {not blond, blond}"                         | Zero-shot | 39.1         | 28.8            |
| "photo of a {not blond, blond}"                         | Zero-shot | 75.9         | 65.2            |
| "a photo of a {not blond, blond}"                       | Zero-shot | 64.0         | 39.7            |
| "photo of a {not blond, blond} people"                  | Zero-shot | 80.7         | 77.9            |
| "a photo of a {not blond, blond} people"                | Zero-shot | 85.4         | 76.1            |
| "photo of a {not blond, blond} hair people"             | Zero-shot | 78.5         | 70.7            |
| "a photo of a {not blond, blond} hair people"           | Zero-shot | 75.6         | 64.5            |
| And "a photo of a {male, female} people" <sup>2</sup>   | L-DRO     | 85.9±0.9     | <b>79.7±1.9</b> |

<sup>1</sup> classification and debiasing text prompts use the same structure, e.g., "a photo of a { } people" will be used for both classification and debiasing text prompts.

<sup>2</sup> " " denotes default choice.
